# Supplementary material
Source: PubMed Central journal article supplement (PMC7045498)
Supplement: ao9b04037_si_001.pdf [file ao9b04037_si_001.pdf]

# Supporting Information

## Improved Synthesis and Isolation of Bedaquiline

Hlengekile Lubanyana,<sup>[a]</sup> Per I. Arvidsson,<sup>[a,b]</sup> Thavendran Govender,<sup>[a]</sup> Hendrik G. Kruger<sup>[a]</sup> and Tricia Naicker<sup>[a]</sup> \*

---

*[a]* Catalysis and Peptide Research Unit, University of KwaZulu-Natal, Durban 4000, South Africa

*[b]* Science for Life Laboratory, Drug Discovery & Development Platform & Division of Translational Medicine and Chemical Biology, Department of Medical Biochemistry and Biophysics, Karolinska Institutet, Stockholm, Sweden

|                                                                        |    |
|------------------------------------------------------------------------|----|
| <b>Supporting Information</b> .....                                    | 1  |
| <b>1. Experimental Details</b> .....                                   | 1  |
| <b>1.1 Instruments</b> .....                                           | 1  |
| <b>2. Preparation of reagents</b> .....                                | 2  |
| <b>3. Experimental Procedures and Characterization Data</b> .....      | 3  |
| <b>4. <sup>1</sup>H NMR, <sup>13</sup>C NMR, and SFC Spectra</b> ..... | 11 |
| <b>5. References</b> .....                                             | 23 |

## 1. Experimental Details

**General:** All reagents and solvents were purchased from Sigma Aldrich and Merck unless stated otherwise. All air and moisture-sensitive reactions were carried out in anhydrous solvents under argon using oven or flame-dried glassware. All solvents were distilled prior use: THF, toluene, and diethyl ether were distilled from sodium (Na) and benzophenone ketyl and hexane from calcium hydride. Reactions at -78°C were conducted on an ice bath made from dry carbon-dioxide and acetone. Flash column chromatography was carried out using silica gel 60 (70- 230 mesh), and thin-layer chromatography were carried out using Merck Kieselgel F254 aluminum-backed silica plates. All reagents were of analytical grade.

### 1.1 Instruments

**Bruker Avance III 400 MHz Nuclear Magnetic Resonance (NMR) spectrometer** was used to record all <sup>1</sup>H NMR spectra deuterated chloroform as the solvent. <sup>1</sup>H chemical coupling constants are reported in parts per million (ppm) downfield from tetra-methylsilane (TMS), and coupling constants (*J*) are reported in Hertz [Hz]. The following abbreviations are used to designate signal multiplicity: (s) singlet, (d) doublet, (t) triplet, (q) quartet, and (m) multiplet.

**Shimadzu Liquid Chromatography-Mass Spectrometer (LC/MS-2020)** was used to monitor all reactions YMC-Triart C18 Column (150 x 4.6 mm, 5 μm) and a mass spectrometer detector.

The solvents, acetonitrile, and methanol (Aldrich, co.ltd) were purchased and used after degassing for 30 minutes. All the spectra were viewed at 220nm.

**Sepiatec Preparative Super-critical Fluid Chromatography** was used to separate the (RS, SR)-BDQ diastereomer using the Chiralpak IA (0.4 x 1cm) column (Diacel Chemical Industries, Ltd). The mobile phase was composed of carbon dioxide, 6% of (50/50 methanol: isopropanol) as a modifier with 0.3% isopropyl amine (IPA) as an additive. The injection volume used was 100 $\mu$ l at a flow rate of 5 ml/min, and back pressure was 150 bar at a column compartment temperature of 40 °C using the stacked injection programme. All spectra were viewed at 220nm.

**Chiral High-Performance Liquid Chromatography (Agilent technologies)** was used for the determination of enantiomeric excess using a Chiralpak IA (0.4 x 1cm) column (Diacel Chemical Industries, Ltd). The solvent system that was used was 0.5% isopropanol in hexane with a 0.5 ml/min flowrate and 5 $\mu$ l injection volume, and the column temperature used was 25°C. All the spectra were viewed at 220nm.

## 2. Preparation of reagents

### 3-benzyl-6-bromo-2-methoxyquinoline

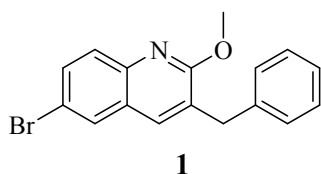

Compound **1** was purchased from DLD Scientific, South Africa and was tested to be >95% of purity through <sup>1</sup>H NMR analysis. White solid; m.p 84°C; Rf: 0.5 (50/50: EtOAc/ Hexane) <sup>1</sup>H NMR (400MHz, )  $\delta$ = 7.21- 7.75 (m, 9H), 4.07 (s, 3H), 4.02 (s, 2H). <sup>13</sup>C NMR (100MHz, CDCl<sub>3</sub>) 144.1, 138.8, 135.7, 131.8, 129.2, 129.0, 128.5, 126.0, 117.3, 53.7, 36.0 ppm. MS (ESI): m/z 327, found 328 [M+H]<sup>+</sup>

### Isolation of 3-(dimethylamino)-1-propionaphthone

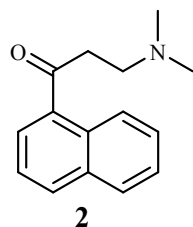

3-(dimethylamino)-1-propionaphthone-HCl (200 mg) was added to 5% NaHCO<sub>3</sub> in water (50 ml), thereafter dichloromethane (3x25 ml) was used for the extraction. The organic layers free from HCl (confirmed by using pH paper) was dried over anhydrous magnesium sulphate (MgSO<sub>4</sub>) and concentrated in *vacuo*. The yellow oil of the neutral 3-(dimethylamino)-1-propionaphthone was further washed with toluene to remove any aqueous traces followed by submission to the high vacuum pump for 3 hours to remove residual solvent. <sup>1</sup>H NMR (400MHz, CDCl<sub>3</sub>) δ = 8.56 (d, 1H, J= 8.49 Hz), 7.98 (d, 1H, J= 8.29), 7.87 (d, 2H, J= 6.68), 7.60 -7.48 (m, 3H), 3.24 (t, 2H), 2.81 (t, 2H); 2.28 (s, 6H). <sup>13</sup>C NMR (100MHz, CDCl<sub>3</sub>) 203.7, 136.4, 134.3, 132.8, 130.4, 128.7- 124.7, 55.0, 45.7, 40.8 ppm. MS (ESI): m/z 226, found 228 [M+H]<sup>+</sup>

### 3. Experimental Procedures and Characterization Data

#### 1-(6-bromo-2-methoxyquinolin-3-yl)-4-(dimethylamino)-2-(naphthalen-1-yl)-1-phenylbutan-2-ol

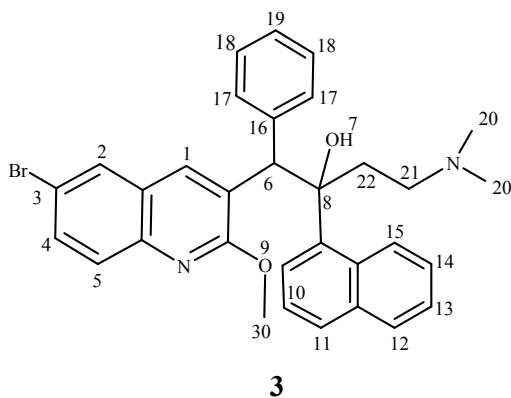

The *dr* was measured by integration of the chiral proton (H6) where 5.89ppm (desired) and 5.73 ppm (undesired) from the crude <sup>1</sup>H NMR spectrum.

#### General Procedure for the synthesis of bedaquiline:

All glassware was pre-dried in the oven, and further flame dried before use. To a solution of *N, N*-diisopropylamine (0.10 ml, 5 equiv.) in freshly distilled THF (2.0 ml), a volume of 0.47 ml of

1.6M *n*-butyllithium (*n*-BuLi) (as a solution in hexane was obtained from Merck, and was titrated by using *N*-benzylbenzamide as the indicator to confirm its concentration)<sup>1</sup> (0.76 mmol, 5 equiv.) was added dropwise at -78°C under the flow of argon. The solution was stirred for 15 minutes and then warmed up to 0°C and stirred further for 15 minutes. The light brownish solution was recooled at -78°C. A solution of 3-benzyl-6-bromo-methoxyquinoline (50 mg, 1 equiv.) in THF (1.0 ml) was slowly added. After 30 minutes of stirring, a solution of 3-(dimethylamino)-1-propionaphthone (42 mg, 1.2 equiv.) in THF (1.0 ml) was added dropwise at -78°C. After 3 hours, the reaction was warmed up to room temperature and quenched with 1.0 ml saturated brine (NaCl) then extracted with ethyl acetate (3x5.0 ml). The organic layer was dried over anhydrous MgSO<sub>4</sub> and concentrated *in vacuo* to give a clear yellow oil. The crude product was analyzed on the LC-MS and further characterized by <sup>1</sup>H NMR.

**Procedure for the chiral synthesis using bis(1-phenylethyl)amine enantiomers:**

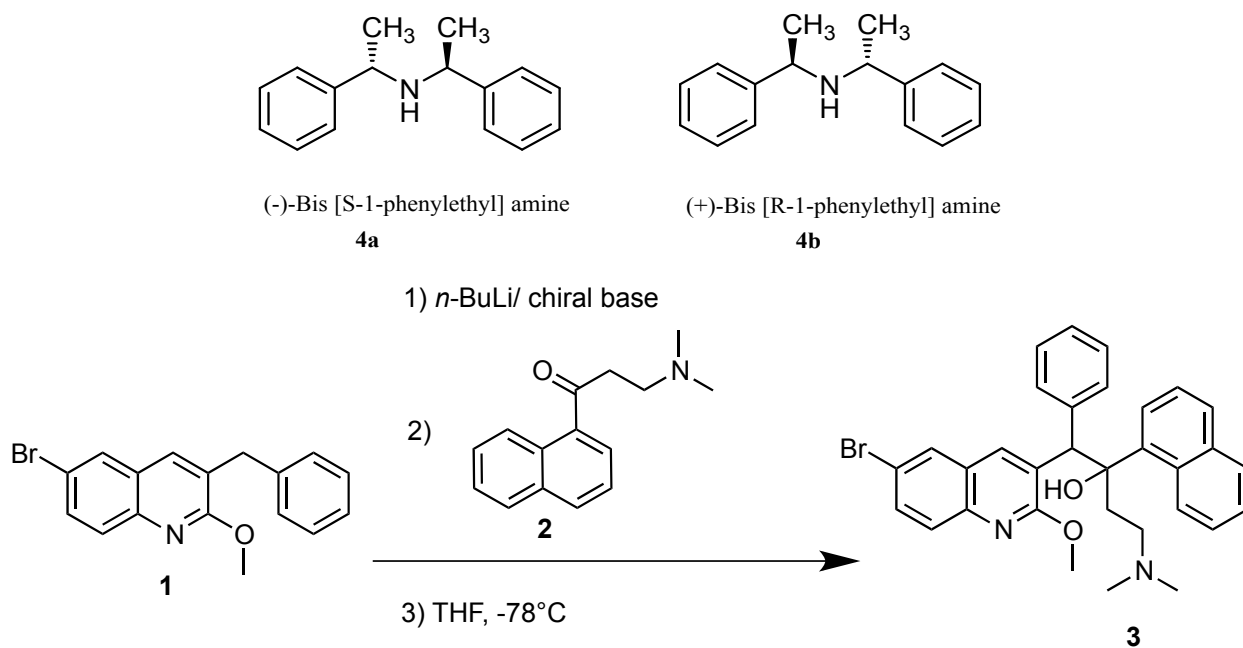

**Scheme S1: Chiral synthesis using bis(1-phenylethyl)amine enantiomers**

**Formation of a chiral base:** To a solution of **4a** or **b** (68.6 mg, 2 equiv.) in THF (2.0 ml), 0.29 ml of 1.6M *n*-BuLi in hexane (0.46mmol, 3 equiv.) was added dropwise at -78°C under the flow of argon. The solution was stirred for 5 minutes and warmed up to room temperature and further

stirred for 1 hour. The clear yellow solution was recooled to  $-78^{\circ}\text{C}$  and again stirred for 1 hour to form a pinkish solution of the chiral base complex.

**Lithiation step:** A solution of **1** (50 mg, 1 equiv.) in THF (0.50 ml) was slowly added to the *in situ* formed chiral base solution from above and stirred at  $-20^{\circ}\text{C}$ . After exactly 1 hour, a solution of **2** (41.5 mg, 1.2 equiv.) in THF (0.5 ml) was added dropwise over 10 min via a cannula, and the resulting solution was stirred at  $-78^{\circ}\text{C}$ . After 3 hours, the reaction was warmed up to room temperature and quenched with aqueous NaCl (1.0 ml) then extracted with EtOAc (3x5.0 ml). The organic layer was dried over anhydrous  $\text{MgSO}_4$  and concentrated *in vacuo* to give a clear yellow oil. The crude product was analyzed on the LC-MS and characterized by the  $^1\text{H}$  NMR.

**Chiral synthesis using bis(1-phenylethyl)amine hydrochloride salt:**

The salt was made according to the reported procedure.<sup>1</sup> To a solution of **4a or b**·HCl salt (79.6 mg, 2 equiv.) in THF (2.0 ml), 0.28 ml of 1.6M *n*-BuLi in hexane (0.46 mmol, 3 equiv.) was added dropwise at  $-78^{\circ}\text{C}$  under the flow of argon. The solution was stirred for 5 minutes and warmed up to room temperature and stirred further for 1 hour. The clear yellow solution was recooled to  $-78^{\circ}\text{C}$  and again stirred for 1 hour to form a pinkish solution of a chiral base complex.

**Lithiation step:** A solution of **1** (50 mg, 1 equiv.) in THF (0.50 ml) was slowly added to an *in situ* formed chiral base from above and stirred at  $-20^{\circ}\text{C}$ . After exactly 1 hour, a solution of **2** (41.5 mg, 1.2 equiv.) in THF (0.50 ml) was added dropwise over 10 min via a cannula, and the resulting solution was stirred at  $-78^{\circ}\text{C}$  for 3 hours. The reaction was warmed up to room temperature and quenched with aqueous NaCl (1.0 ml) then extracted with EtOAc (3x5.0 ml). The organic layer was dried over anhydrous  $\text{MgSO}_4$  and concentrated *in vacuo* to give a clear yellow oil. The crude product was analyzed on the LC-MS and characterized by the  $^1\text{H}$  NMR.

**Table S1.** Optimization of equivalents using *n*-BuLi:**4a** in THF

| Entry | Equivalents of base | Deprotonation temperature /°C | % Conversion |
|-------|---------------------|-------------------------------|--------------|
| 1     | 5:5                 | -78                           | 0            |
| 2     | 3.5:2.5             | -78                           | trace amount |
| 3     | 3:2                 | -78                           | 5            |

% conversion was determined by LC-MS using the YMC-Triart-C18 column unless stated otherwise. The deprotonation was allowed to take place for 30 minutes using *n*-BuLi:**4a**. All reactions were carried out at -78°C on a 0.15 mmol scale. The deprotonation step took place over 30 minutes and the reaction with the electrophile for 3 hours.

**Table S2.** Optimization of deprotonation time using *n*-BuLi:**4a**

| Entry | Deprotonation time/minutes | %Conversion       |
|-------|----------------------------|-------------------|
| 1     | 15                         | 10                |
| 2     | 60                         | 33                |
| 3     | 90                         | 5 + side products |
| 4     | 120                        | side products     |

% conversion was determined by LC-MS using the YMC-Triart-C18 column unless stated otherwise. The deprotonation was allowed to take place for 30 minutes using *n*-BuLi:**4a**. All reactions were carried out at -78°C on a 0.15 mmol scale.

**Table S3.** Optimization of deprotonation temperature using *n*-BuLi:**4a**

| Entry | Deprotonation temperature/°C | % Conversion  |
|-------|------------------------------|---------------|
| 1     | -60                          | trace amount  |
| 2     | -40                          | 5             |
| 3     | -20                          | 15            |
| 4     | 0                            | side products |

% conversion was determined by LC-MS using the YMC-Triart-C18 column unless stated otherwise and the *dr* was determined by crude <sup>1</sup>H NMR. The deprotonation was conducted at -20°C using *n*-BuLi:4a and all reactions were carried out at -78°C on a 0.15 mmol scale.

**Table S4.** Optimization of the chiral base 4a with additive

| Entry | Base                                      | <i>dr</i> | %Conversion |
|-------|-------------------------------------------|-----------|-------------|
| 1     | <i>n</i> -BuLi/<br>4a.LiCl <sup>[a]</sup> | 45:55     | 33          |
| 2     | <i>n</i> -BuLi/<br>4a.LiCl <sup>[b]</sup> | 30:70     | 32          |

% conversion was determined by LC-MS using the YMC-Triart-C18 column unless stated otherwise and the *dr* was determined by crude <sup>1</sup>H NMR. [a] was made by the addition of LiCl and [b] was made from adding *n*-BuLi to 4a.HCl. The deprotonation was conducted at -20°C and all reactions were carried out at -78°C on a 0.15 mmol scale.

#### Scaled up procedure using 4b·HCl

The salt was made according to the reported procedure.<sup>1</sup> To a solution of 4b·HCl salt (1.6 g, 2 equiv.) in THF (20.0 ml), 5.61 ml of 1.6M *n*-BuLi in hexane (9.2 mmol, 3 equiv.) was added dropwise at -78°C under the flow of argon. The solution was stirred for 10 minutes and warmed up to room temperature and stirred further for 1 hour. The clear yellow solution was recooled to -78°C and again stirred for 1 hour to form a pinkish solution of a chiral base complex.

**Lithiation step:** A solution of 1 (1.0 g, 1 equiv.) in THF (10.0 ml) was slowly added to an *in situ* formed chiral base from above and stirred at -20°C. After exactly 1 hour, a solution of 2 (0.83 g, 1.2 equiv.) in THF (10.0 ml) was added dropwise over 20 min via a cannula, and the resulting solution was stirred at -78 °C for 3 hours. The reaction was warmed up to room temperature and quenched with aqueous NaCl (20.0 ml) then extracted with EtOAc (5x10.0 ml). The organic layer was dried over anhydrous MgSO<sub>4</sub> and concentrated *in vacuo* to give a clear yellow oil. The crude product was further purified by flash column chromatography 1:1 (EtOAc/Hexane). Rf: 0.30 undesired (35mg) and 0.44 desired (285mg) diastereomers as white solids. The *RS*, *SR* was then subject to semi-prep SFC for separation, which provided the desired enantiomer 1*R*,2*S* (130 mg). m.p 104 °C.  $[\alpha]_D^{25} = -175$  (c = 1, DMF)<sup>2</sup> and 1*S*,2*R* (142 mg) with the NMR data as reported below.



The characterization data compared well with literature. Optical purity was established by chiral HPLC analysis (Chiralpak IA, 2-propanol: hexane = 0.5: 99.5, 0.5 mL/min,  $\lambda$  = 220 nm): Rt = 10.1 (*RS*), 11.4 (*SR*) min.

For the desired diastereomer (*RS*, *SR*)-BDQ,  $^1\text{H}$  NMR (400MHz,  $\text{CDCl}_3$ )  $\delta$  = 8.89 (s, 1 H, H7), 8.61 (d, J = 8.6 Hz, 1 H, H15), 7.96 (d, J = 2.0 Hz, 1 H, H2), 7.92 (d, J = 7.4 Hz, 1 H, H9), 7.87 (d, J = 8.1 Hz, 1 H, H12), 7.72 (d, J = 8.8 Hz, 1 H, H6), 7.68–7.56 (m, 3 H, H4, H11, H14), 7.48 (t, J = 7.6 Hz, 1 H, H13), 7.30 (t, J = 7.7 Hz, 1 H, H10), 7.17–7.10 (m, 2 H, H17), 6.93–6.83 (m, 3 H, H18, H19), 5.89 (s, 1 H, H6), 4.21 (s, 3 H, H22), 2.60–2.51 (m, 1 H, H20), 2.18–2.02 (m, 2 H, H20', H21), 1.99 (s, 6 H, H22), 1.95–1.85 (m, 1 H, H21') ppm.  $^{13}\text{C}$  NMR (100 MHz,  $\text{CDCl}_3$ ):  $\delta$  = 161.3, 143.7, 141.6, 140.5, 138.7, 134.6, 131.9, 129.9, 129.8, 129.7, 128.4, 128.1, 127.8, 127.3, 127.1, 126.8, 125.7, 125.2, 125.1, 125.0, 124.4, 116.9, 82.4, 56.2, 54.1, 49.5, 44.6, 33.4, 29.6 ppm. MS (ESI): m/z 555.5, found 556  $[\text{M}+\text{H}]^+$

For the undesired diastereomer (*RR*, *SS*)-BDQ,  $^1\text{H}$  NMR (400MHz,  $\text{CDCl}_3$ )  $\delta$  = 8.58 (s, 1 H, H1), 8.48 (d, J = 8.7 Hz, 1 H, H15), 7.99 (dd, J = 7.4, 0.9 Hz, 1 H, H9), 7.88 (d, J = 7.3 Hz, 2 H, H17), 7.82–7.75 (m, 2 H, H12, H2), 7.60–7.50 (m, 2 H, H14, H11), 7.47–7.32 (m, 4 H, H5, H18, H4, H13), 7.30–7.21 (m, 2 H, H19, H10), 5.73 (s, 1 H, H6), 3.25 (s, 3 H, H22), 2.49 (td, J = 14.3, 3.0 Hz, 1 H, H20), 2.26 (td, J = 12.2, 3.2 Hz, 1 H, H20'), 2.14–1.90 (m, 9 H, H21, H21', H22) ppm.  $^{13}\text{C}$  NMR (100 MHz,  $\text{CDCl}_3$ ):  $\delta$  = 160.4, 143.2, 141.6, 141.1, 137.8, 134.6, 131.2, 130.0, 129.6, 129.5, 128.1, 128.0, 127.9, 127.6, 127.4, 127.1, 126.5, 126.4, 125.4, 124.9, 124.8, 124.3, 116.2, 81.5, 56.1, 52.7, 50.9, 44.5, 34.1, 29.6 ppm. MS (ESI): m/z 555.5, found 556  $[\text{M}+\text{H}]^+$

### Chiral synthesis using sparteine enantiomers:

**Formation of a chiral base:** To a solution of **5a** or **5b** (71 mg, 2 equiv.) in THF (2.0 ml), 0.28 ml of 1.6M *n*-BuLi in hexane (0.46 mmol, 3 equiv.) was added dropwise at  $-78^\circ\text{C}$  under the flow of argon. The solution was stirred for 5 minutes and warmed up to room temperature and further stirred for 1 hour. The clear yellow solution was recooled to  $-78^\circ\text{C}$  and again stirred for 1 hour to form chiral base complex.

**Lithiation step:** A solution of **1** (50 mg, 1 equiv.) in THF (0.50 ml) was slowly added to the *in situ* formed chiral base solution from above and stirred at -20°C. After exactly 1 hour, a solution of **2** (42 mg, 1.2 equiv.) in THF (0.50 ml) was added dropwise over 10 min via a cannula, and the resulting solution was stirred at -78 °C. After 3 hours, the reaction was warmed up to room temperature and quenched with aqueous NaCl (1.0 ml) then extracted with EtOAc (3x5.0 ml). The organic layer was dried over anhydrous MgSO<sub>4</sub> and concentrated *in vacuo*. The crude product was tested on the TLC and further analyzed on the LC-MS however no product formation was observed.

#### **Chiral synthesis using bisoxazoline enantiomers:**

**Formation of a chiral base:** To a solution of **6a or 6b** (101 mg, 2 equiv.) in THF (2.0 ml), 0.2855 ml of 1.6M *n*-BuLi in hexane (0.46 mmol, 3 equiv.) was added dropwise at -78°C under the flow of argon. The solution was stirred for 5 minutes and warmed up to room temperature and further stirred for 1 hour. The clear yellow solution was recooled to -78°C and again stirred for 1 hour to form a chiral base complex.

**Lithiation step:** A solution of **1** (50 mg, 1.0 equiv.) in THF (0.50 ml) was slowly added to the *in situ* formed chiral base solution from above and stirred at -20°C. After exactly 1 hour, a solution of **2** (42 mg, 1.2 equiv.) in THF (0.50 ml) was added dropwise over 10 min via a cannula, and the resulting solution was stirred at -78 °C. After 3 hours, the reaction was warmed up to room temperature and quenched with aqueous NaCl (1.0 ml) then extracted with EtOAc (3x5.0 ml). The organic layer was dried over anhydrous MgSO<sub>4</sub> and concentrated *in vacuo*. The crude product was tested on the TLC and further analyzed on the LC-MS however no product formation was observed.

#### 4. $^1\text{H}$ NMR, $^{13}\text{C}$ NMR, and SFC Spectra

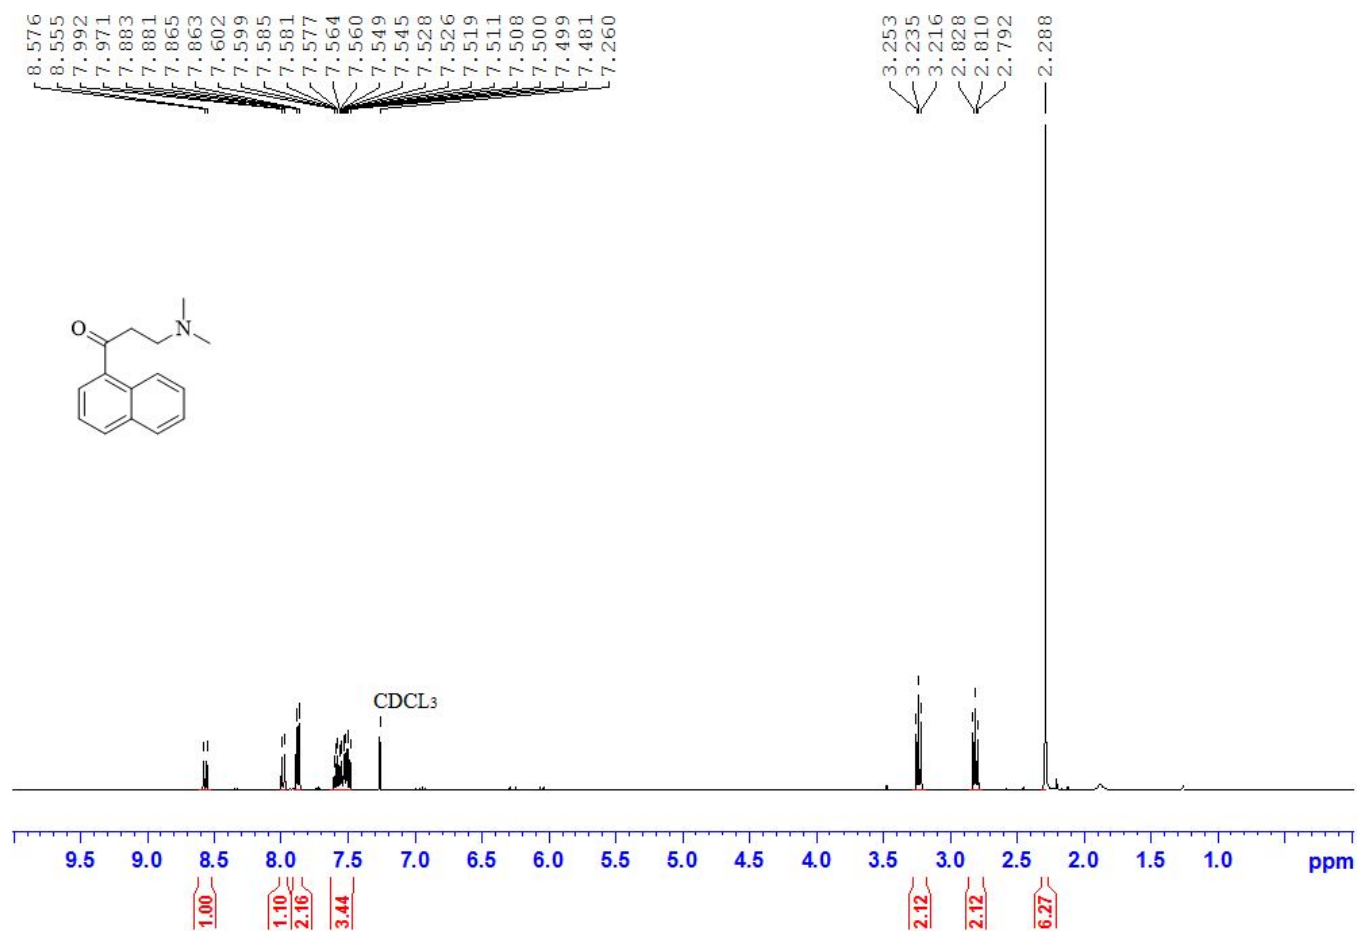

Figure S1- $^1\text{H}$  NMR Spectrum of Compound 2 in  $\text{CDCl}_3$

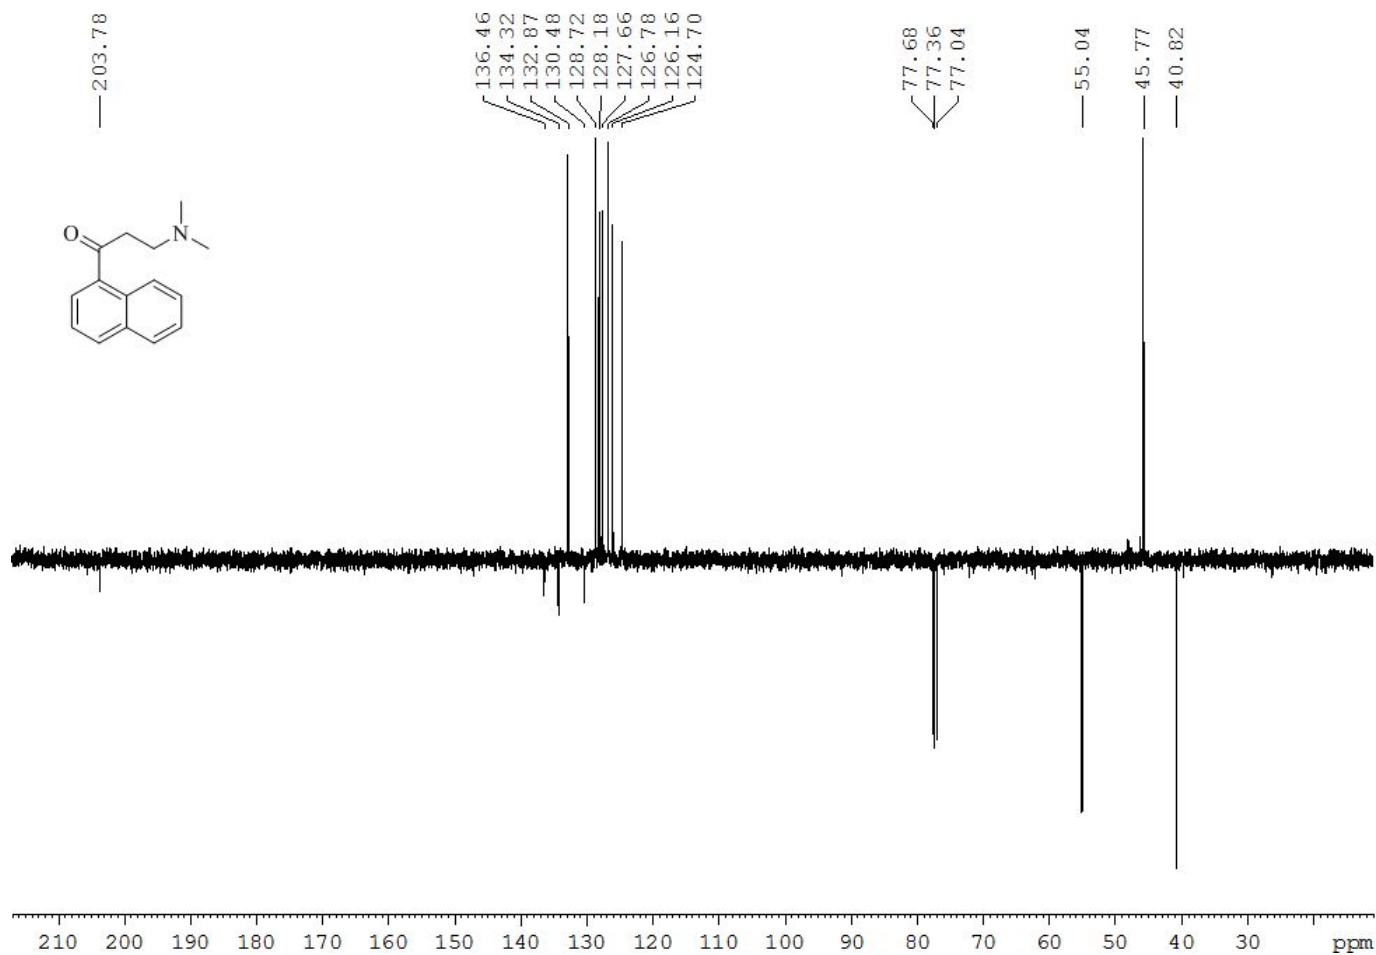

Figure S2-<sup>13</sup>C NMR Spectrum of Compound 2 in CDCl<sub>3</sub>

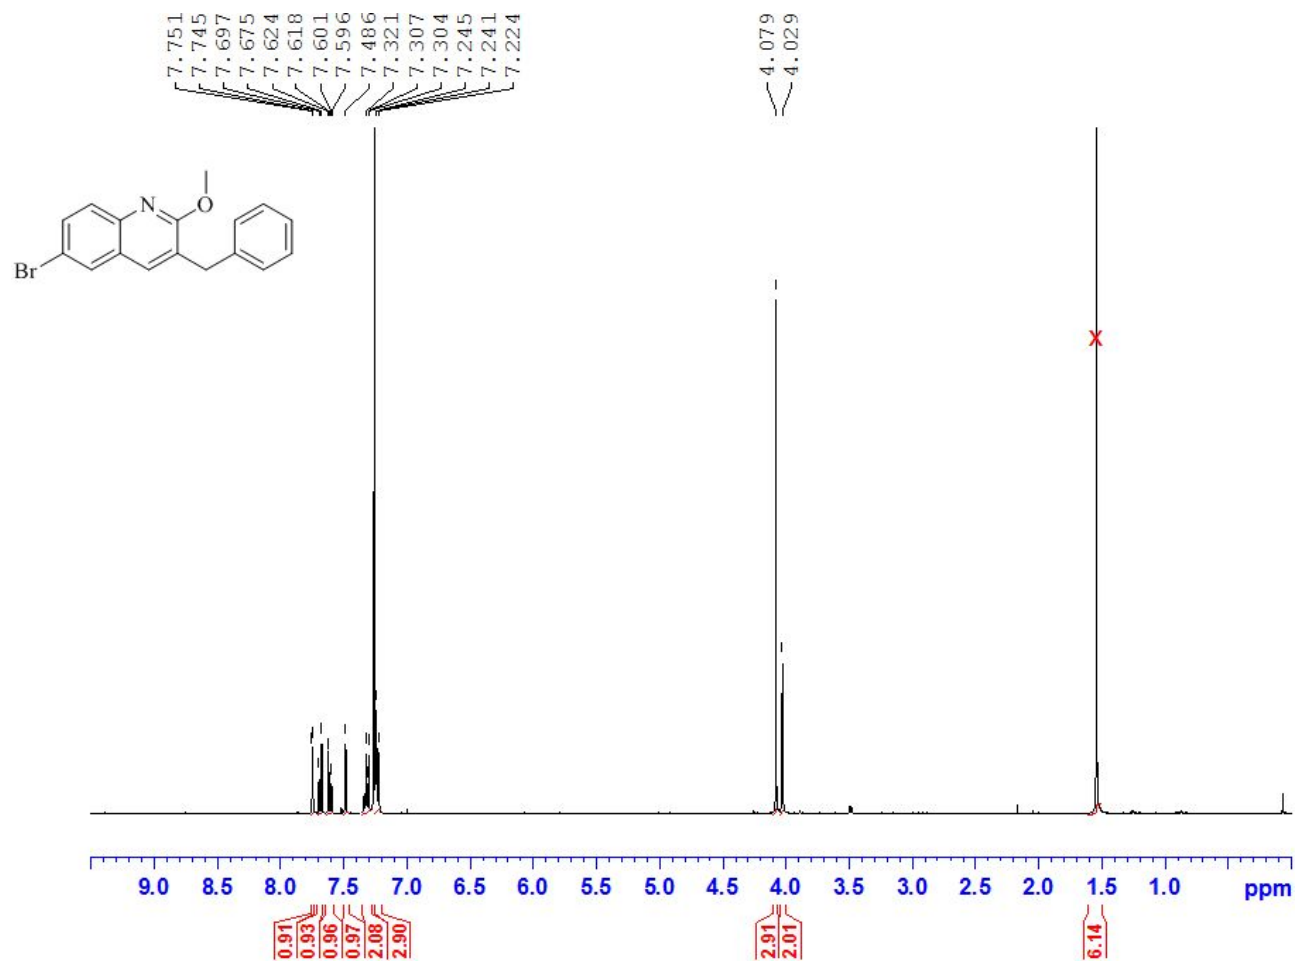

Figure S3-<sup>1</sup>H NMR Spectrum of Compound 1 in CDCl<sub>3</sub>

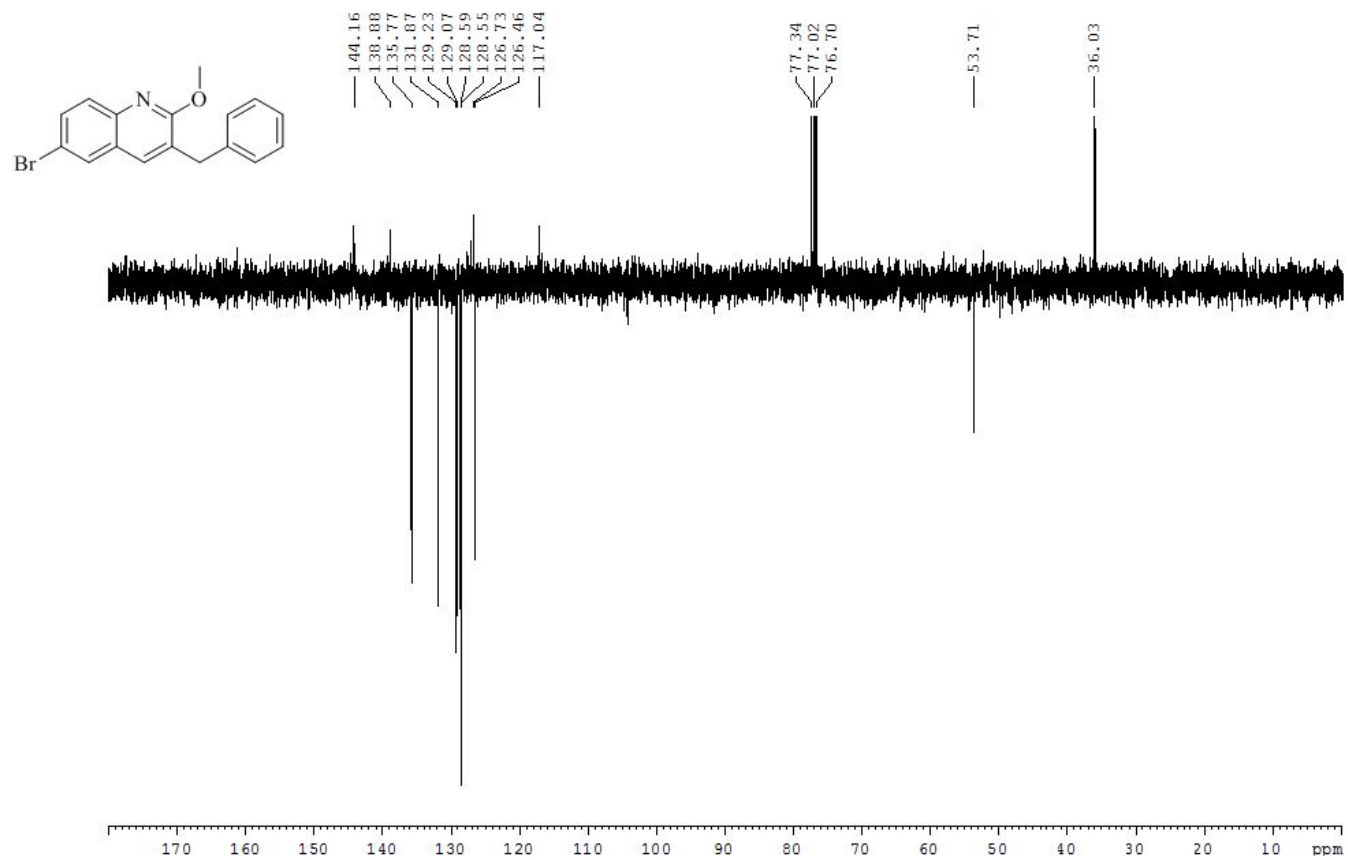

Figure S4-<sup>13</sup>C NMR Spectrum of Compound 1 in CDCl<sub>3</sub>

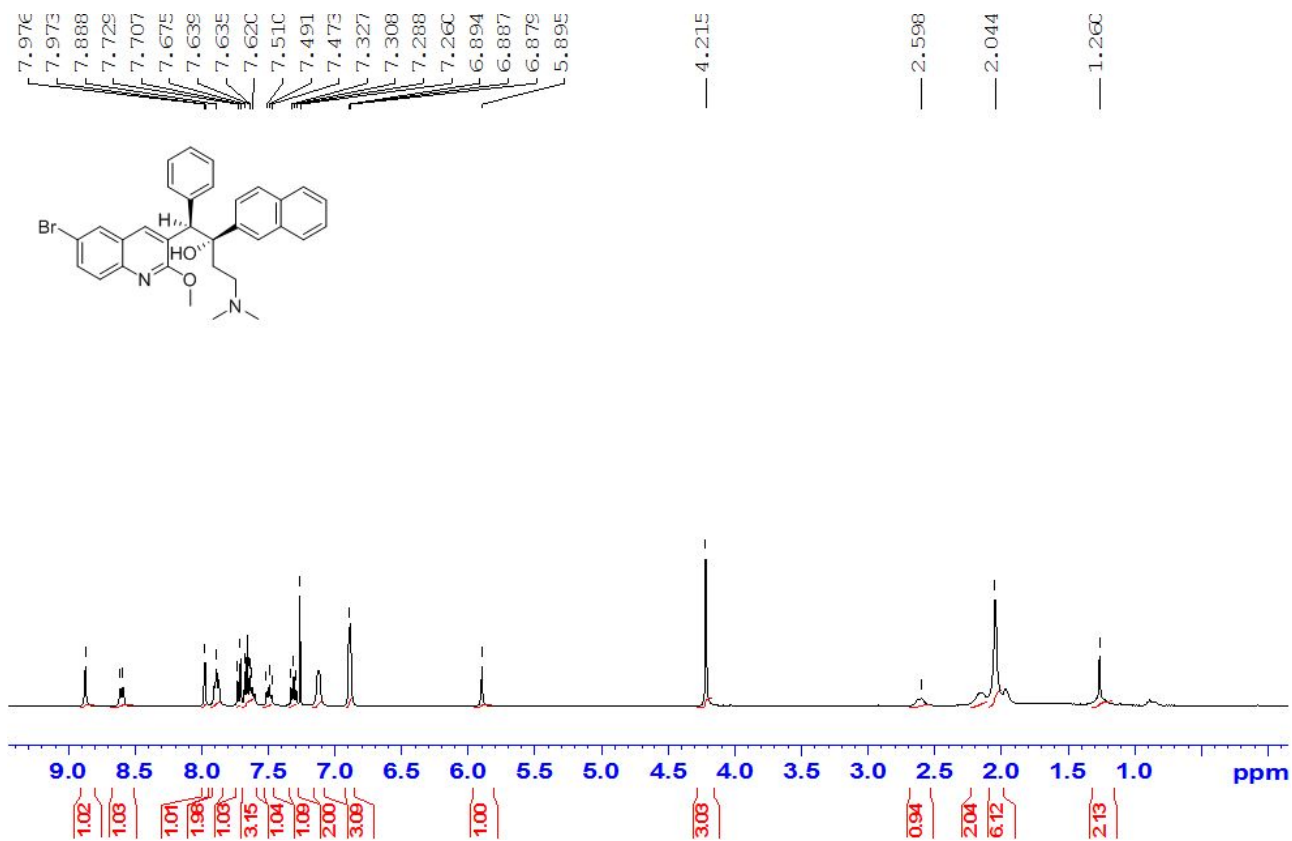

Figure S5-<sup>1</sup>H NMR Spectrum of (*RS, SR*) diastereomer (desired) in CDCl<sub>3</sub>

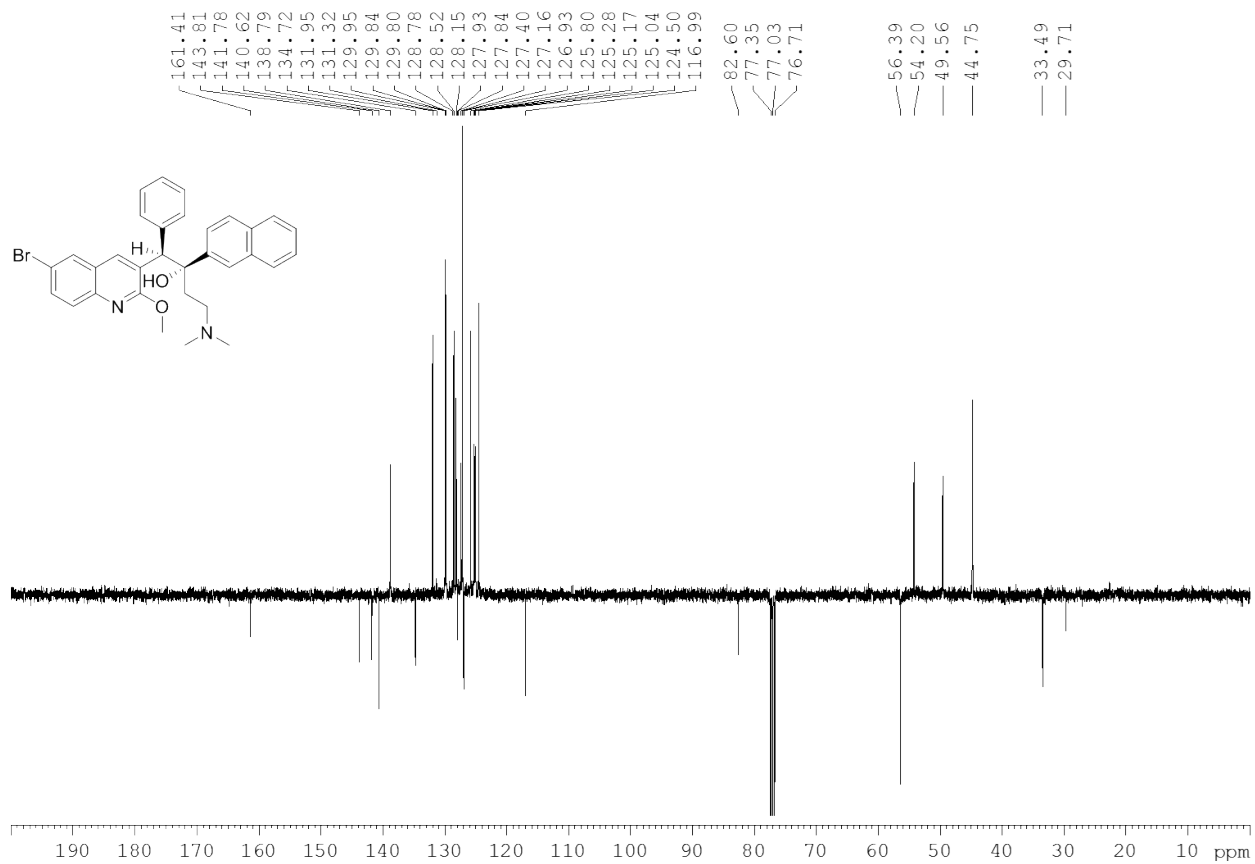

Figure S6-<sup>13</sup>C NMR spectrum of (1R, 2S)-BDQ diastereomer in CDCl<sub>3</sub>



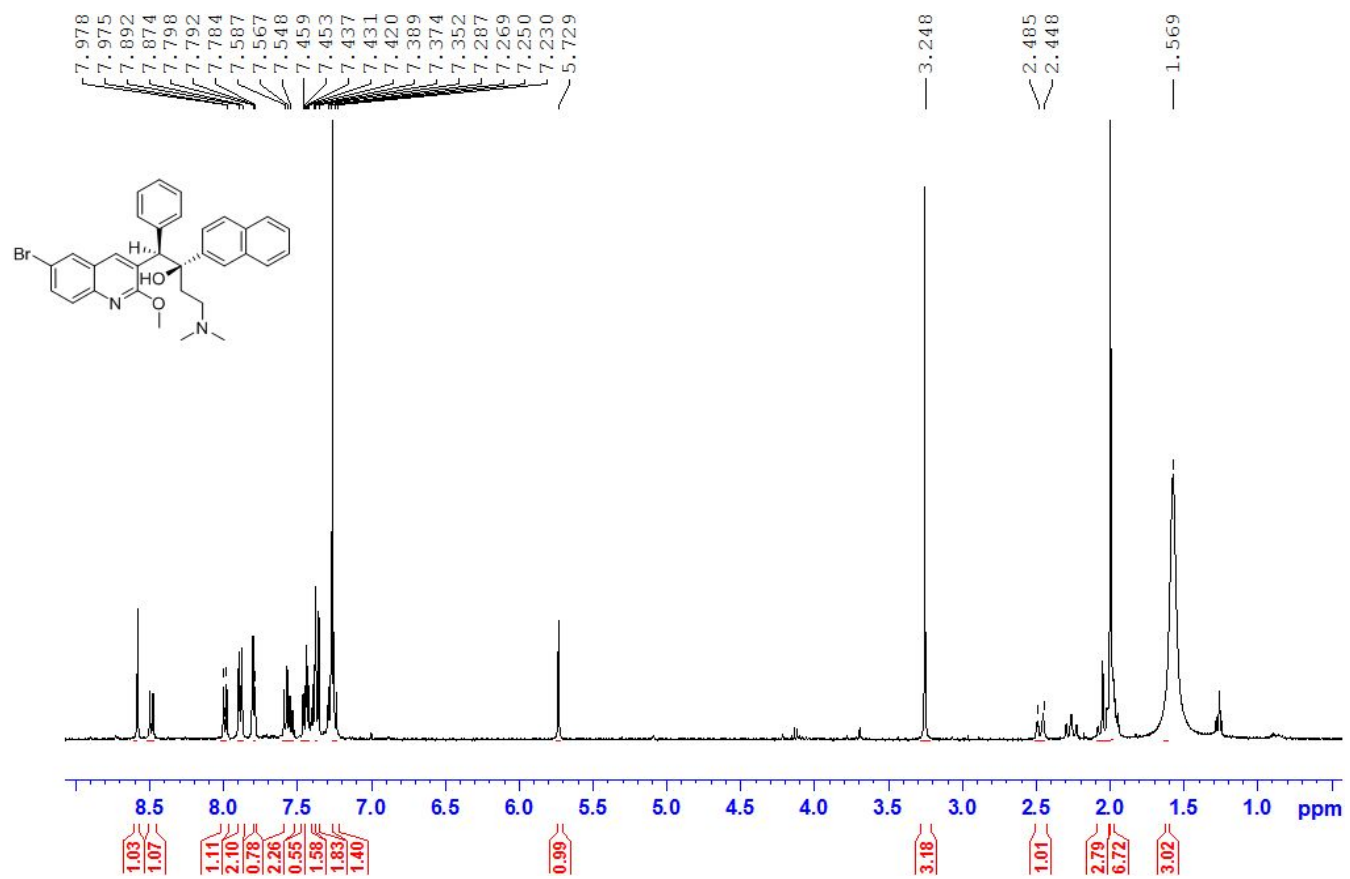

Figure S7- $^1\text{H}$  NMR Spectrum of  $(RR, SS)$  diastereomer (undesired) in  $\text{CDCl}_3$

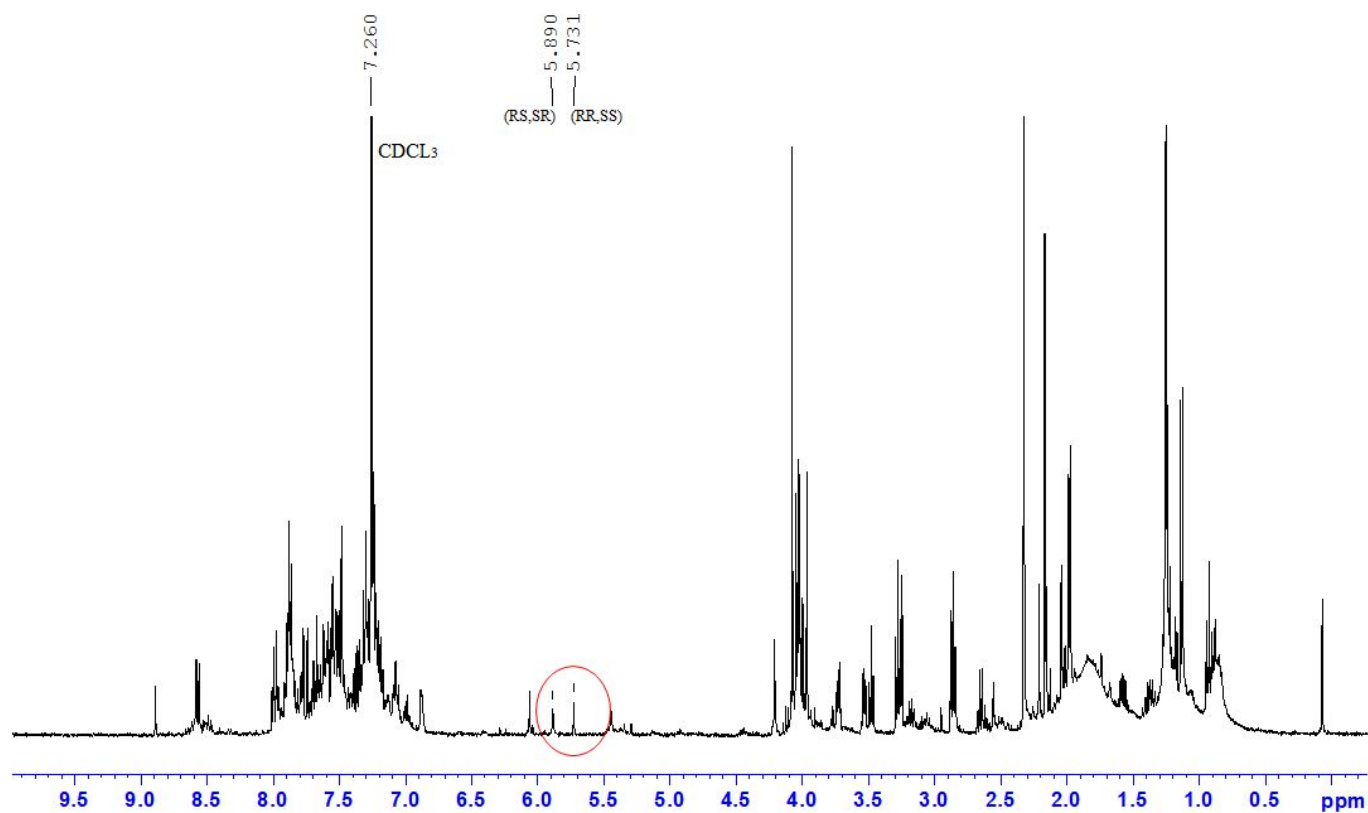

**Figure S8-<sup>1</sup>H NMR Spectrum of a crude mixture obtained using LDA as a base( 50:50 *dr*).**

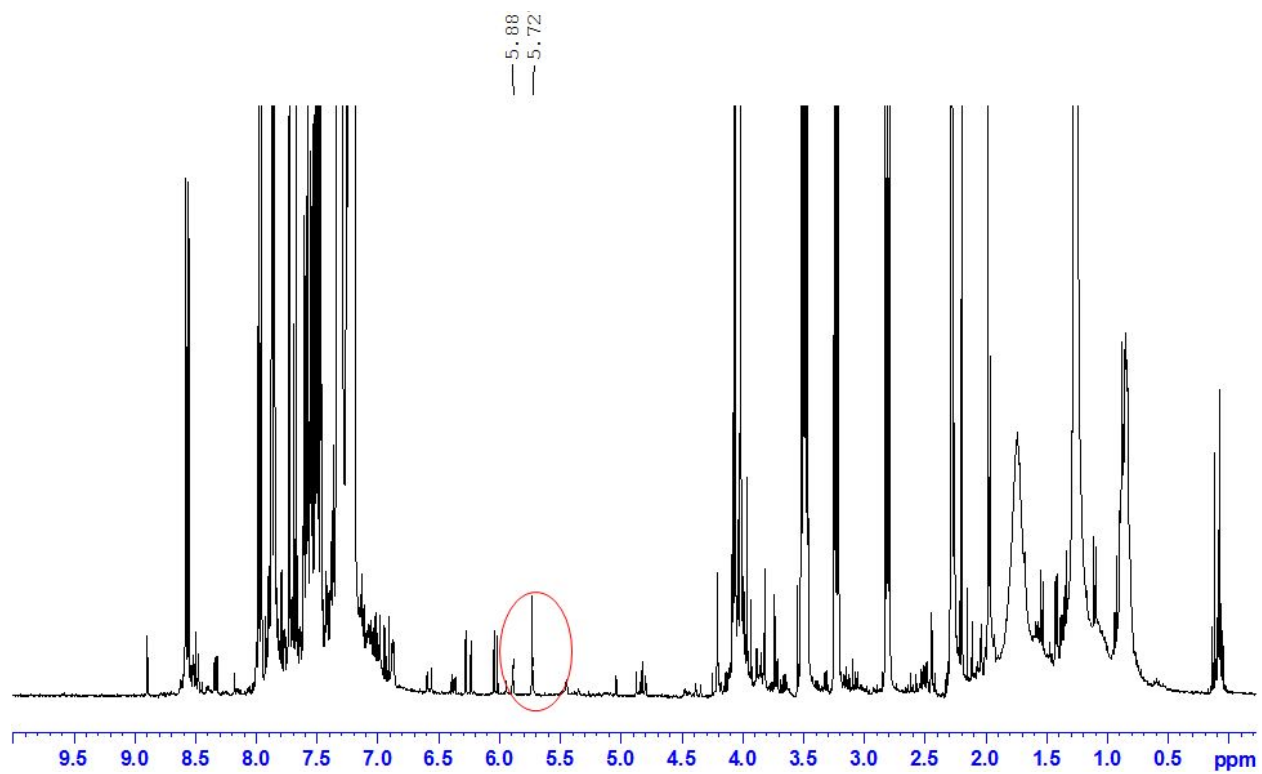

**Figure S9-<sup>1</sup>H NMR Spectrum of a crude mixture in CDCl<sub>3</sub> made from *n*-BuLi/4a hydrochloride salt chiral complex (30:70 *dr*).**

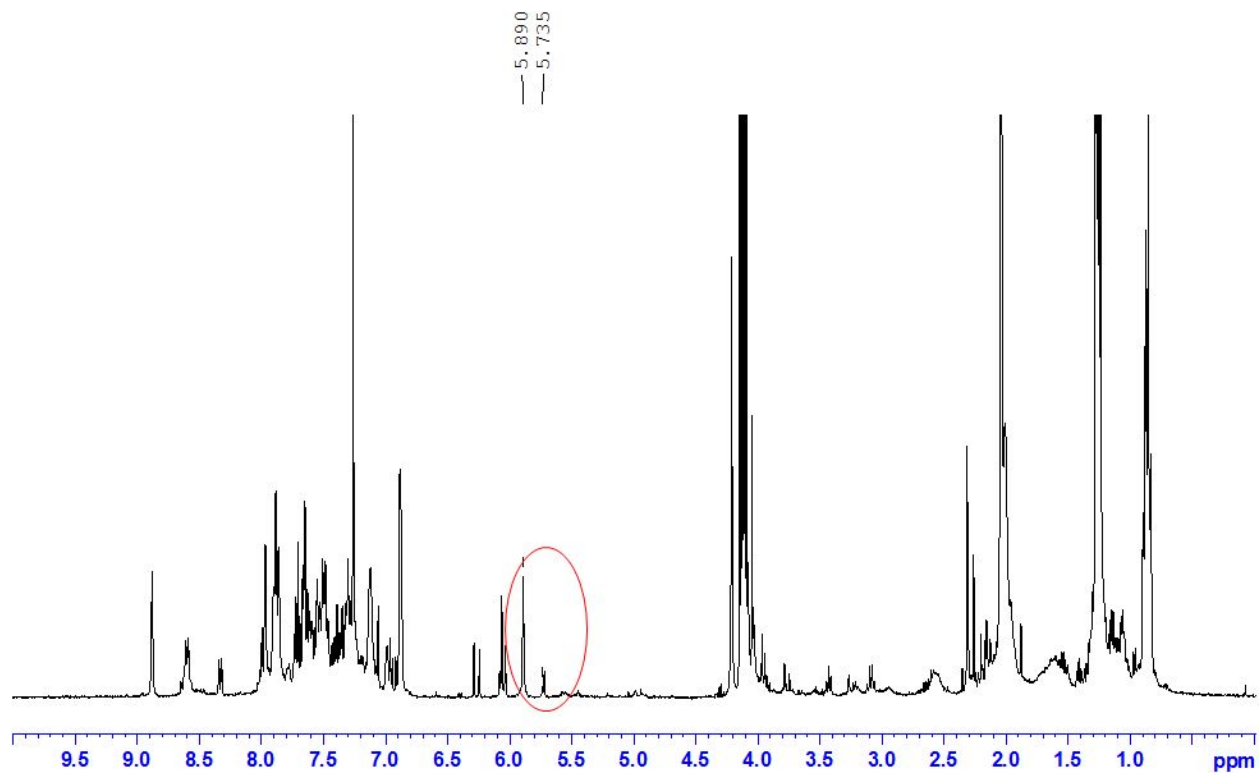

**Figure S10-<sup>1</sup>H NMR Spectrum of a crude mixture in CDCl<sub>3</sub> made from *n*-BuLi/4b hydrochloride salt chiral complex (90:10 *dr*).**

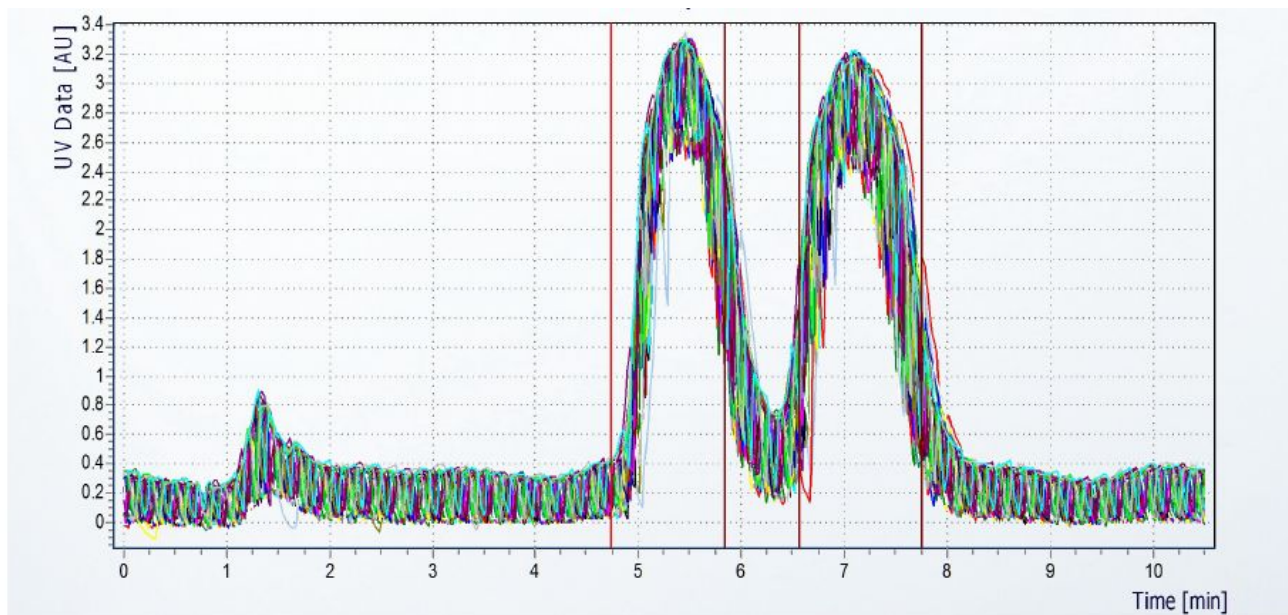

**Figure S11-SFC stacked injection spectrum of a racemic mixture of (1*R*, 2*S*)-BDQ and its enantiomer respectively.**

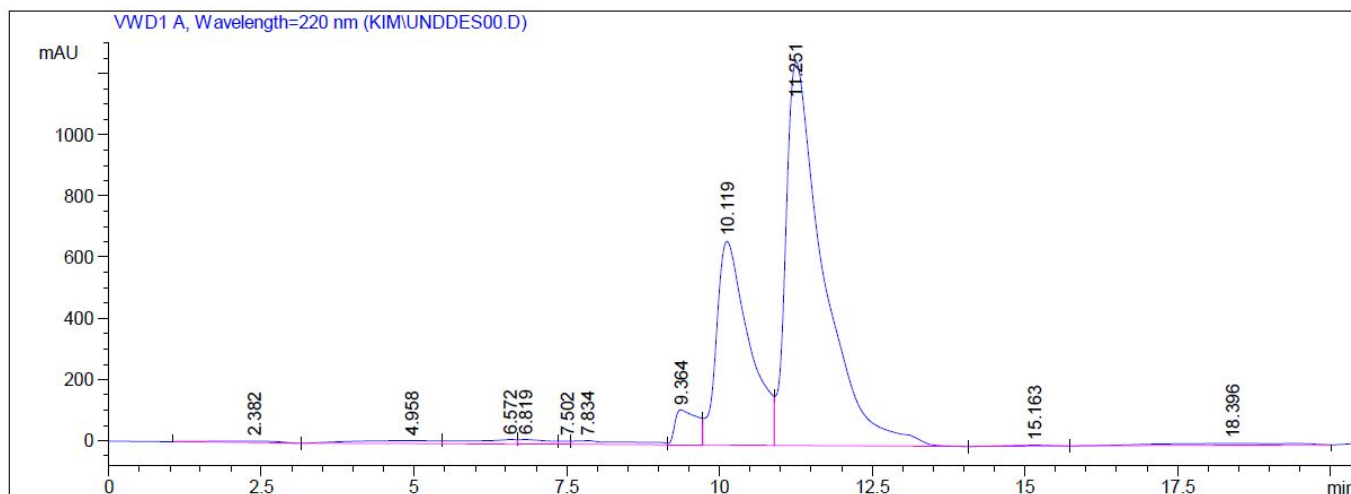

**Figure S12-Chiral HPLC spectrum of the racemic mixture of BDQ enantiomers**

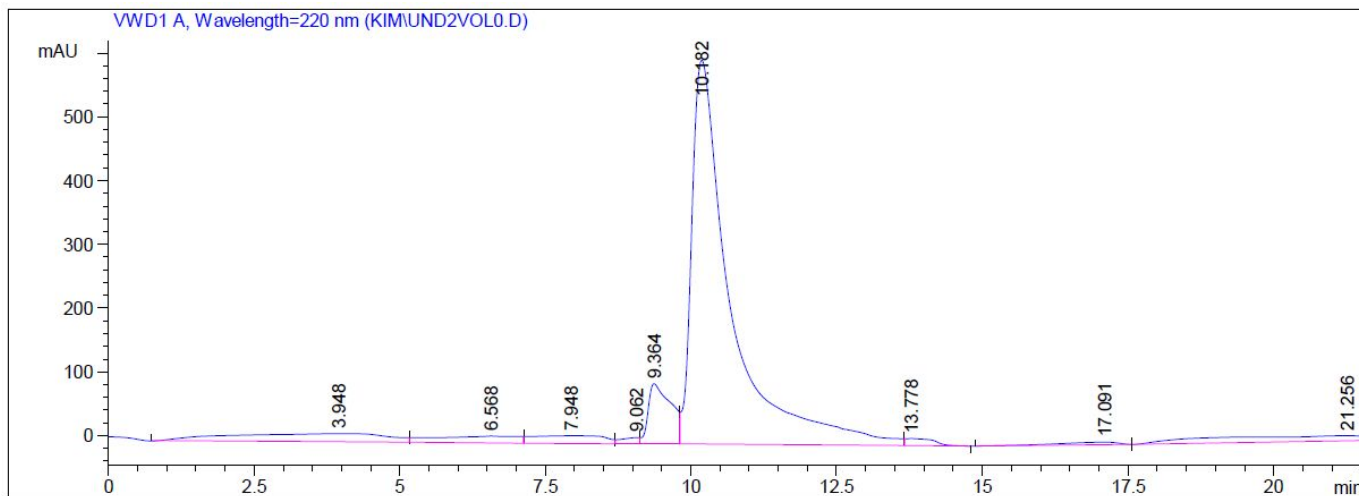

**Figure S13-Chiral HPLC spectrum of (1R, 2S)-BDQ (desired isomer)**

## 5. References

- (1) Vulont, I.; Gais, H. J.; Reuter, N.; Schmitz, E.; Ossenkamp, R. K. Asymmetric Synthesis of 3-Oxacarbacyclin and 3-Oxaisocarbacyclin by a Common Enantioselective Deprotonation Based Route. *Eur. J. Org. Chem.* **1998**, *1998*, 805-826.
- (2) Chandrasekhar, S.; Babu, G. K.; Mohapatra, D. K. Practical Syntheses of (2S)-R207910 and (2R)-R207910. *Eur. J. Org. Chem.* **2011**, *2011*, 2057-2061.
